# Supplementary material for: Regulation of Human Natural Killer Cell IFN-γ Production by MicroRNA-146a via Targeting the NF-κB Signaling Pathway
Source: PubMed Central journal article supplement (PMC5854688; doi:10.3389/fimmu.2018.00293), 2018-03-09
Supplement: presentation_1.pdf [file presentation_1.pdf]

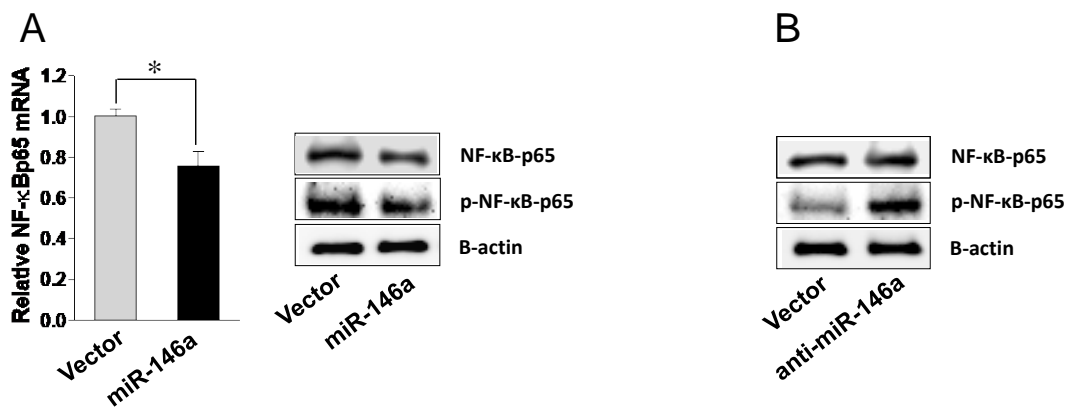

**Figure S1 NF-κB signaling is negatively regulated by miR-146a in resting and cytokine-stimulated human NK cells.**

NK-92 cells expressing miR-146a or anti-miR-146a were cultured in medium without IL-2 for 24 h. Cells were harvested to extract RNA, followed by cDNA synthesis. Then the expression of NF-κB p65 at the mRNA level was quantified by qRT-PCR (A). NF-κB p65 protein levels and its activity were measured by immunoblotting (A, B). The reported results are representative of at least three donors with similar results. Data shown are mean  $\pm$  SD. \*,  $p < 0.05$ ; \*\*,  $p < 0.01$ . Error bars represent SD.
